# Supplementary material for: A2A and A3 adenosine receptor expression in rheumatoid arthritis: upregulation, inverse correlation with disease activity score and suppression of inflammatory cytokine and metalloproteinase release
Source: Springer Nature journal article supplement (doi:10.1186/ar3527), 2011-12-06
Supplement: 13075_2011_3280_MOESM3_ESM.pdf [file 13075_2011_3280_MOESM3_ESM.pdf]

**A**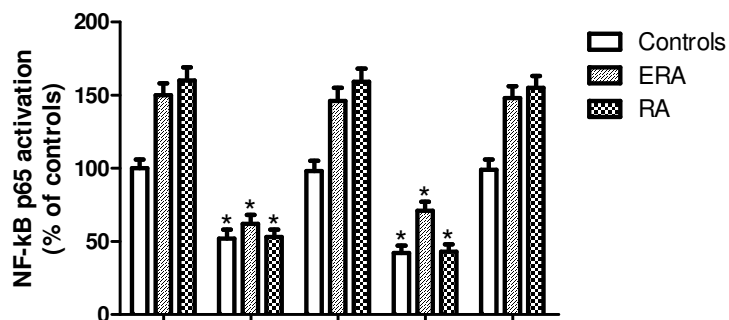

|                      |   |   |   |   |   |
|----------------------|---|---|---|---|---|
| CGS 21680 100 nM     | - | + | + | - | - |
| SCH 442416 1 $\mu$ M | - | - | + | - | - |
| CI-IB-MECA 100 nM    | - | - | - | + | + |
| MRS 1334 1 $\mu$ M   | - | - | - | - | + |

**B**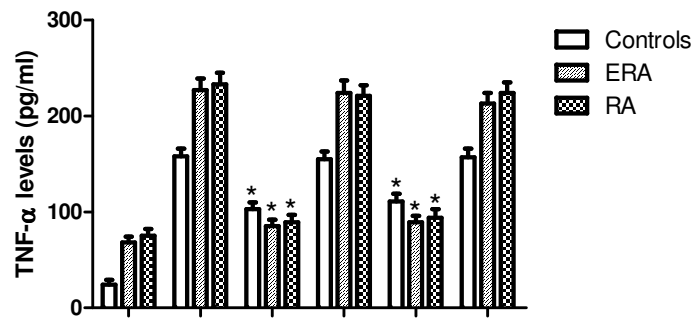

|                      |   |   |   |   |   |   |
|----------------------|---|---|---|---|---|---|
| PMA 5 ng/ml          | - | + | + | + | + | + |
| CGS 21680 100 nM     | - | - | + | + | - | - |
| SCH 442416 1 $\mu$ M | - | - | - | + | - | - |
| CI-IB-MECA 100 nM    | - | - | - | - | + | + |
| MRS 1334 1 $\mu$ M   | - | - | - | - | - | + |

**C**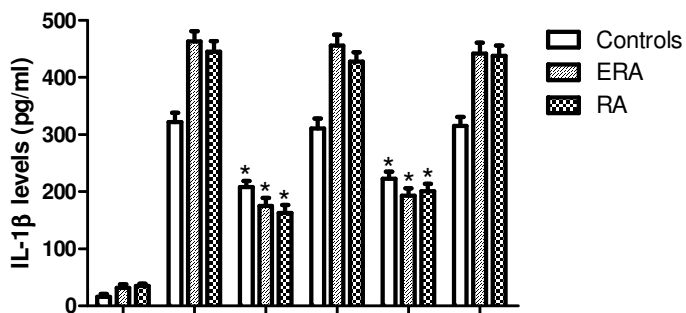

|                      |   |   |   |   |   |   |
|----------------------|---|---|---|---|---|---|
| PMA 5 ng/ml          | - | + | + | + | + | + |
| CGS 21680 100 nM     | - | - | + | + | - | - |
| SCH 442416 1 $\mu$ M | - | - | - | + | - | - |
| CI-IB-MECA 100 nM    | - | - | - | - | + | + |
| MRS 1334 1 $\mu$ M   | - | - | - | - | - | + |

**D**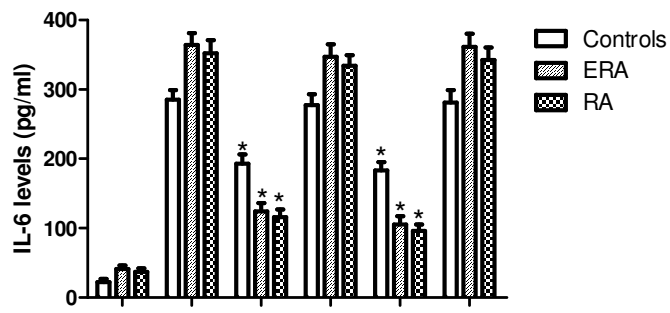

|                      |   |   |   |   |   |   |
|----------------------|---|---|---|---|---|---|
| PMA 5 ng/ml          | - | + | + | + | + | + |
| CGS 21680 100 nM     | - | - | + | + | - | - |
| SCH 442416 1 $\mu$ M | - | - | - | + | - | - |
| CI-IB-MECA 100 nM    | - | - | - | - | + | + |
| MRS 1334 1 $\mu$ M   | - | - | - | - | - | + |

**E**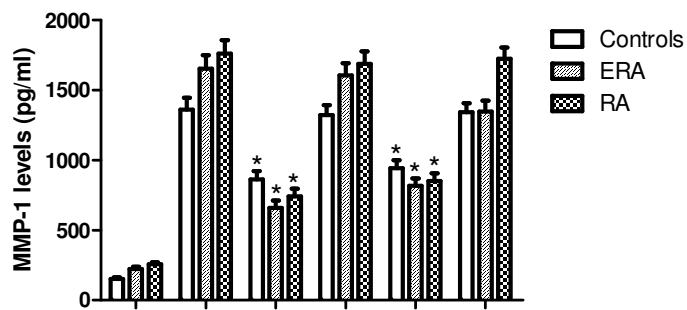

|                      |   |   |   |   |   |   |
|----------------------|---|---|---|---|---|---|
| PMA 5 ng/ml          | - | + | + | + | + | + |
| CGS 21680 100 nM     | - | - | + | + | - | - |
| SCH 442416 1 $\mu$ M | - | - | - | + | - | - |
| CI-IB-MECA 100 nM    | - | - | - | - | + | + |
| MRS 1334 1 $\mu$ M   | - | - | - | - | - | + |

**F**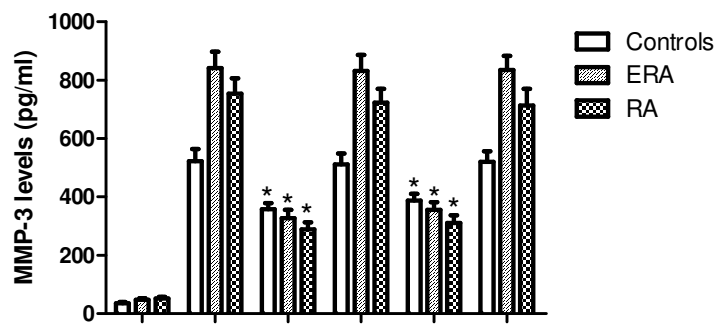

|                      |   |   |   |   |   |   |
|----------------------|---|---|---|---|---|---|
| PMA 5 ng/ml          | - | + | + | + | + | + |
| CGS 21680 100 nM     | - | - | + | + | - | - |
| SCH 442416 1 $\mu$ M | - | - | - | + | - | - |
| CI-IB-MECA 100 nM    | - | - | - | - | + | + |
| MRS 1334 1 $\mu$ M   | - | - | - | - | - | + |
