# Supplementary figures and images for: A2A and A3 adenosine receptor expression in rheumatoid arthritis: upregulation, inverse correlation with disease activity score and suppression of inflammatory cytokine and metalloproteinase release
Source: Springer Nature journal article supplement (doi:10.1186/ar3527), 2011-12-06

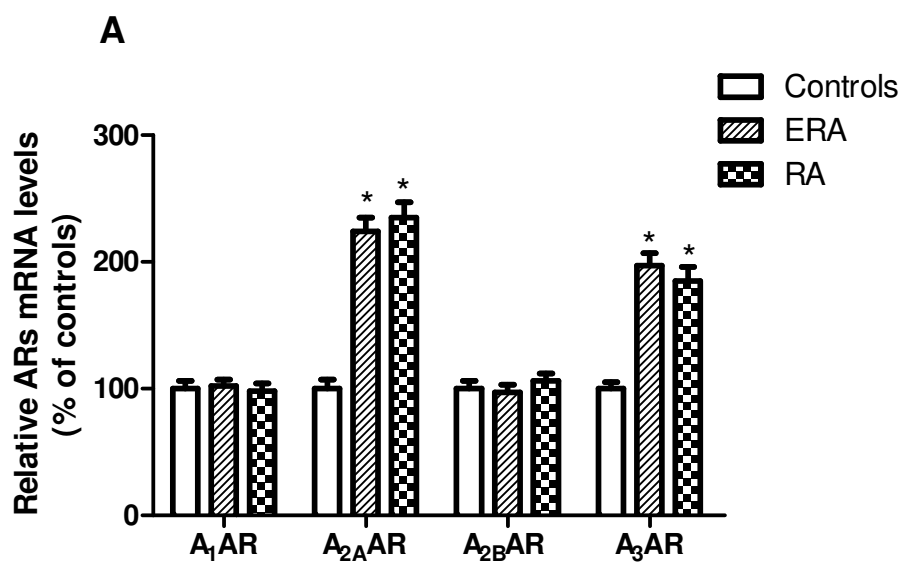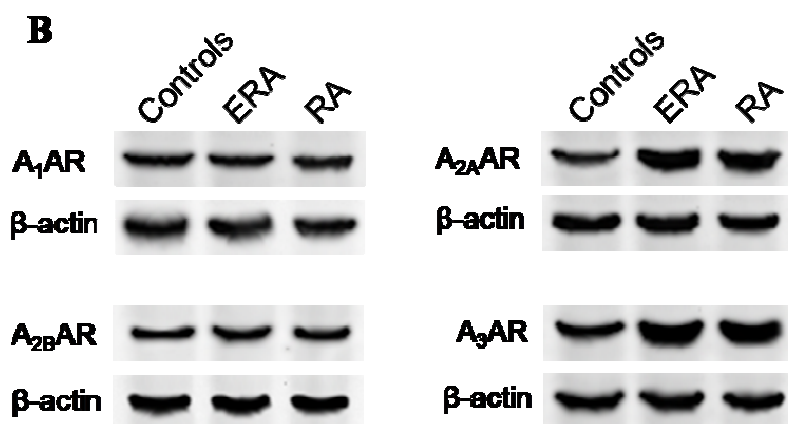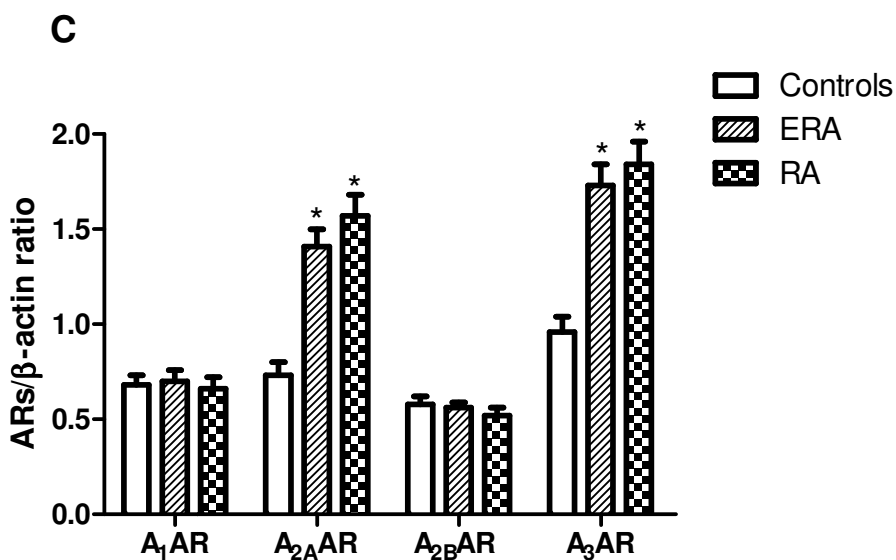

Supplement: 13075_2011_3280_MOESM1_ESM.pdf [file 13075_2011_3280_MOESM1_ESM.pdf]

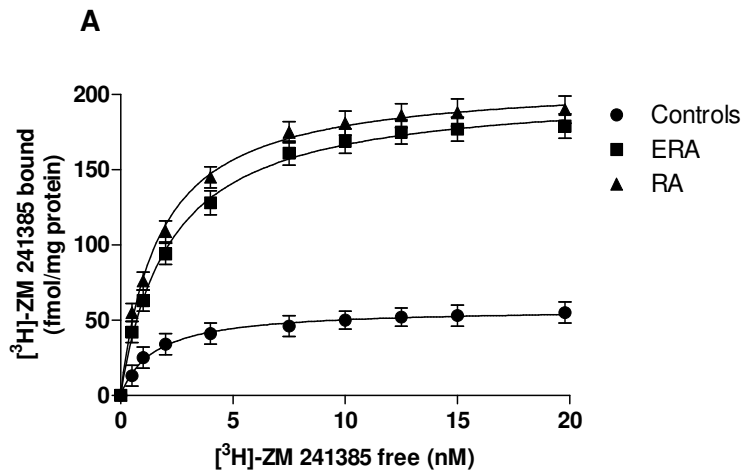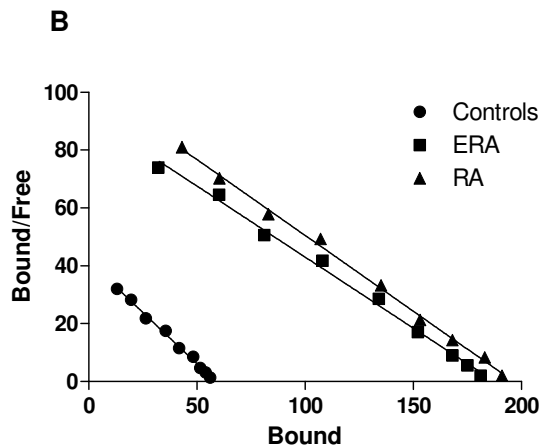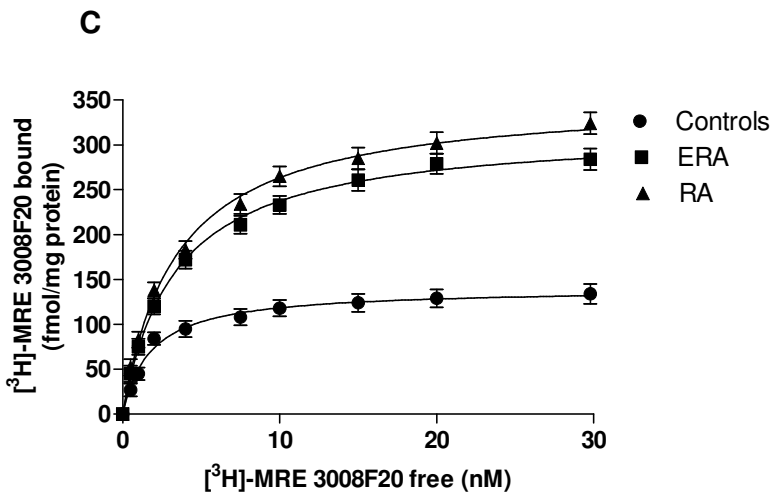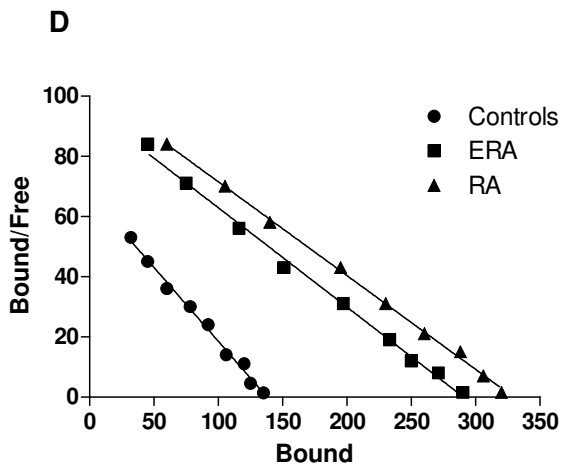

Supplement: 13075_2011_3280_MOESM2_ESM.pdf [file 13075_2011_3280_MOESM2_ESM.pdf]

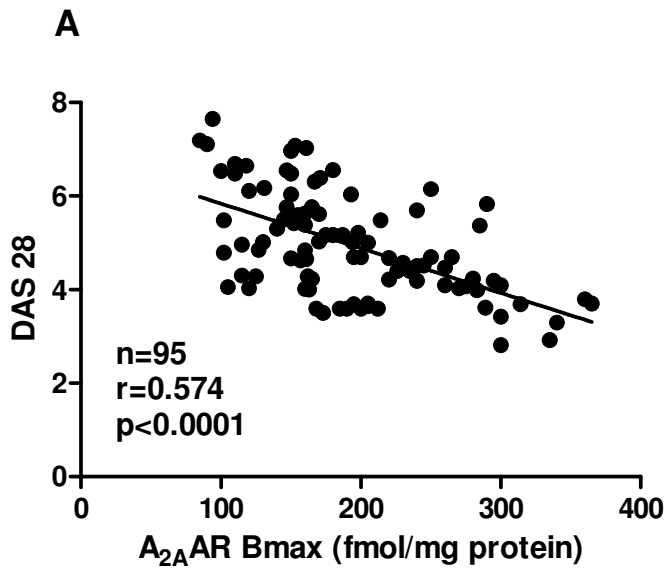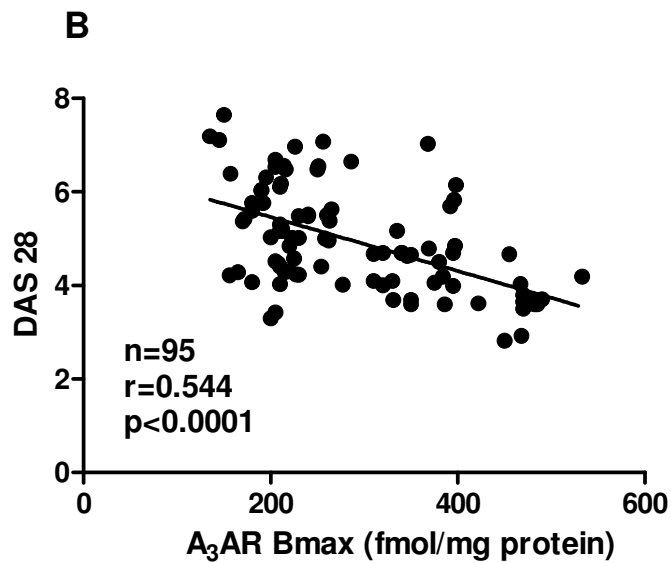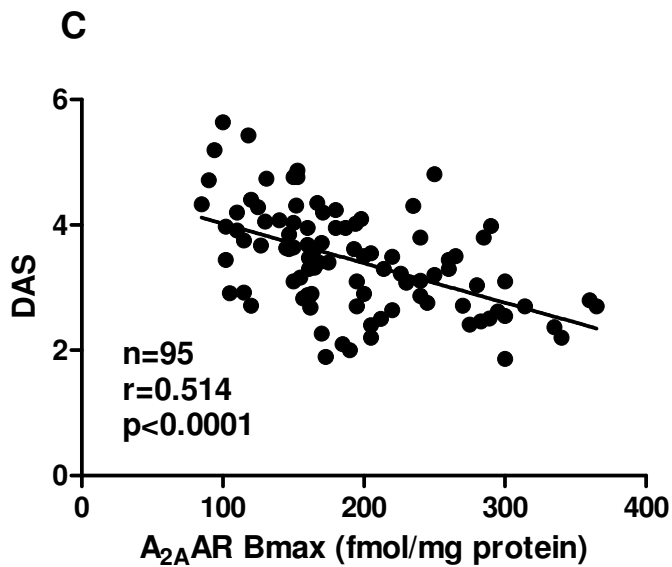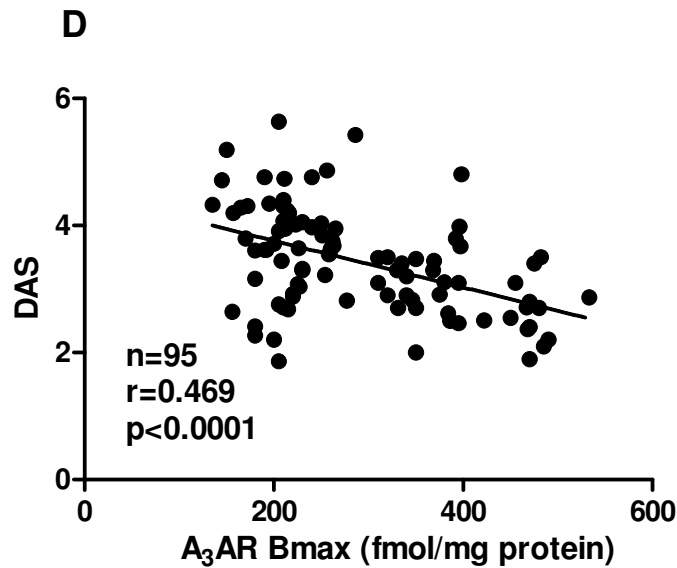

Supplement: 13075_2011_3280_MOESM4_ESM.pdf [file 13075_2011_3280_MOESM4_ESM.pdf]
